# Supplementary material for: 1 km monthly temperature and precipitation dataset for China from 1901 to 2017
Source: Copernicus journal article supplement (doi:10.5194/essd-11-1931-2019), 2019-12-13
Supplement: Supplementary file [file essd-11-1931-2019-supplement.pdf]

Supplement of Earth Syst. Sci. Data, 11, 1931–1946, 2019  
<https://doi.org/10.5194/essd-11-1931-2019-supplement>  
© Author(s) 2019. This work is distributed under  
the Creative Commons Attribution 4.0 License.

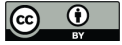

Open Access  
Earth System  
Science  
Data

*Supplement of*

## **1 km monthly temperature and precipitation dataset for China from 1901 to 2017**

**Shouzhang Peng et al.**

*Correspondence to:* Wenzhao Liu ([wzliu@ms.iswc.ac.cn](mailto:wzliu@ms.iswc.ac.cn)) and Zhi Li ([lizhibox@nwafu.edu.cn](mailto:lizhibox@nwafu.edu.cn), [szp@nwafu.edu.cn](mailto:szp@nwafu.edu.cn))

The copyright of individual parts of the supplement might differ from the CC BY 4.0 License.

**Table S1:** Statistical characteristics of original/downscaled and observed monthly TMPs and PRE in the time series (1951–2016). The values shown here are the standard errors at all independent weather stations.

|                  | Res  | MAE <sub>c</sub> | MAE <sub>l</sub> | MAE <sub>n</sub> | RMSE <sub>c</sub> | RMSE <sub>l</sub> | RMSE <sub>n</sub> | NSE <sub>c</sub> | NSE <sub>l</sub> | NSE <sub>n</sub> | Cor <sub>c</sub> | Cor <sub>l</sub> | Cor <sub>n</sub> |
|------------------|------|------------------|------------------|------------------|-------------------|-------------------|-------------------|------------------|------------------|------------------|------------------|------------------|------------------|
| Minimum TMP (°C) | 30'  | 0.074            |                  |                  | 0.073             |                   |                   | 0.015            |                  |                  | 0.001            |                  |                  |
|                  | 10'  | 0.053            | 0.066            | 0.073            | 0.077             | 0.066             | 0.073             | 0.023            | 0.016            | 0.014            | 0.000            | 0.001            | 0.000            |
|                  | 5'   | 0.060            | 0.050            | 0.058            | 0.033             | 0.051             | 0.055             | 0.012            | 0.009            | 0.007            | 0.001            | 0.000            | 0.000            |
|                  | 2.5' | 0.032            | 0.039            | 0.046            | 0.009             | 0.006             | 0.004             | 0.007            | 0.006            | 0.011            | 0.000            | 0.000            | 0.000            |
|                  | 0.5' | 0.043            | 0.033            | 0.031            | 0.044             | 0.034             | 0.036             | 0.005            | 0.004            | 0.003            | 0.000            | 0.000            | 0.000            |
| Mean TMP (°C)    | 30'  | 0.072            |                  |                  | 0.071             |                   |                   | 0.016            |                  |                  | 0.000            |                  |                  |
|                  | 10'  | 0.054            | 0.066            | 0.071            | 0.049             | 0.066             | 0.066             | 0.011            | 0.017            | 0.020            | 0.000            | 0.000            | 0.000            |
|                  | 5'   | 0.098            | 0.051            | 0.044            | 0.048             | 0.051             | 0.034             | 0.014            | 0.010            | 0.009            | 0.000            | 0.000            | 0.001            |
|                  | 2.5' | 0.029            | 0.038            | 0.036            | 0.055             | 0.034             | 0.058             | 0.011            | 0.006            | 0.008            | 0.001            | 0.000            | 0.000            |
|                  | 0.5' | 0.059            | 0.037            | 0.049            | 0.041             | 0.038             | 0.035             | 0.005            | 0.006            | 0.013            | 0.000            | 0.000            | 0.000            |
| Maximum TMP (°C) | 30'  | 0.082            |                  |                  | 0.081             |                   |                   | 0.025            |                  |                  | 0.000            |                  |                  |
|                  | 10'  | 0.050            | 0.075            | 0.064            | 0.093             | 0.077             | 0.085             | 0.033            | 0.021            | 0.024            | 0.000            | 0.000            | 0.001            |
|                  | 5'   | 0.042            | 0.066            | 0.033            | 0.074             | 0.068             | 0.046             | 0.022            | 0.020            | 0.016            | 0.001            | 0.000            | 0.000            |
|                  | 2.5' | 0.077            | 0.052            | 0.067            | 0.033             | 0.053             | 0.040             | 0.021            | 0.013            | 0.016            | 0.000            | 0.000            | 0.000            |
|                  | 0.5' | 0.060            | 0.052            | 0.051            | 0.055             | 0.053             | 0.054             | 0.018            | 0.020            | 0.036            | 0.000            | 0.000            | 0.000            |
| PRE (mm)         | 30'  | 0.440            |                  |                  | 0.691             |                   |                   | 0.038            |                  |                  | 0.004            |                  |                  |
|                  | 10'  | 0.489            | 0.419            | 0.455            | 0.699             | 0.671             | 0.715             | 0.015            | 0.021            | 0.020            | 0.003            | 0.003            | 0.002            |
|                  | 5'   | 0.554            | 0.384            | 0.246            | 0.701             | 0.613             | 0.549             | 0.034            | 0.010            | 0.019            | 0.002            | 0.003            | 0.002            |
|                  | 2.5' | 0.498            | 0.359            | 0.654            | 0.617             | 0.571             | 0.666             | 0.018            | 0.017            | 0.032            | 0.003            | 0.003            | 0.003            |
|                  | 0.5' | 0.385            | 0.332            | 0.454            | 0.482             | 0.527             | 0.715             | 0.027            | 0.011            | 0.014            | 0.003            | 0.003            | 0.003            |

Notes: Res indicates spatial resolution. Subscripts *c*, *l*, and *n* indicate bicubic, bilinear, and nearest-neighbor interpolations, respectively. The original TMPs and PRE are the 30' CRU data and are directly compared with the observed data. Evaluations at 10', 5', 2.5', and 0.5' pertain to the downscaled datasets. MAE, RMSE, NSE, and Cor indicate the mean absolute error, root-mean-square error, Nash–Sutcliffe efficiency coefficient, and correlation coefficient, respectively.
